# Supplementary material for: Metal homeostasis disruption and mitochondrial dysfunction in hepatocytes exposed to sub-toxic doses of zinc oxide nanoparticles
Source: Royal Society of Chemistry journal article supplement (doi:10.1039/c6nr05306h), 2016-01-01
Supplement: c6nr05306h1.pdf [file c6nr05306h1.pdf]

## Supplementary Information

to

### **Metal homeostasis disruption and mitochondrial dysfunction in hepatocytes exposed to sub-toxic doses of zinc oxide nanoparticles**

M. Chevallet<sup>a</sup>, B. Gallet<sup>b</sup>, A. Fuchs<sup>c</sup>, P.H. Jouneau<sup>d</sup>, K.Um<sup>a</sup>, E. Mintz<sup>a</sup>, I. Michaud-Soret<sup>a</sup>

**Figure S1.** Size distributions of a) ZnO-NP-FBS and b) ZnO-NP-silane preparations

a)

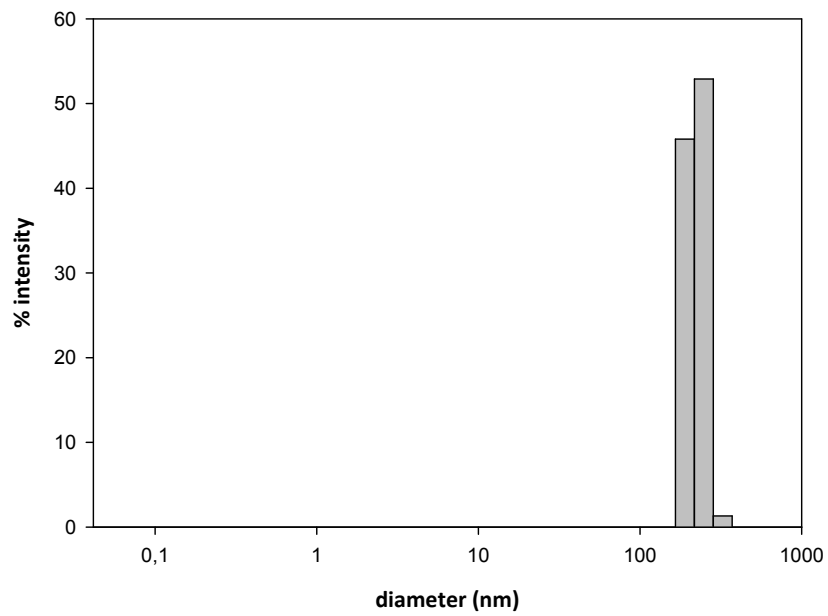

b)

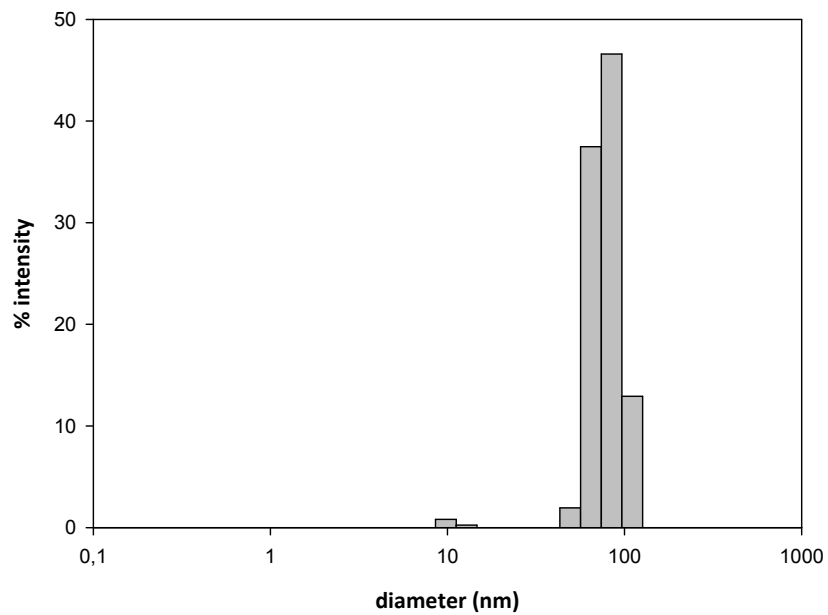

**Figure S2.** Measurement of SOD and CAT activities after a 6 hour incubation with Zn acetate, ZnO-NP-FBS or ZnO-NP-silane at 90  $\mu$ M. Results were expressed in enzymatic units/mg of protein as the average + SEM of 4 independent experiments.  $P>0.05$

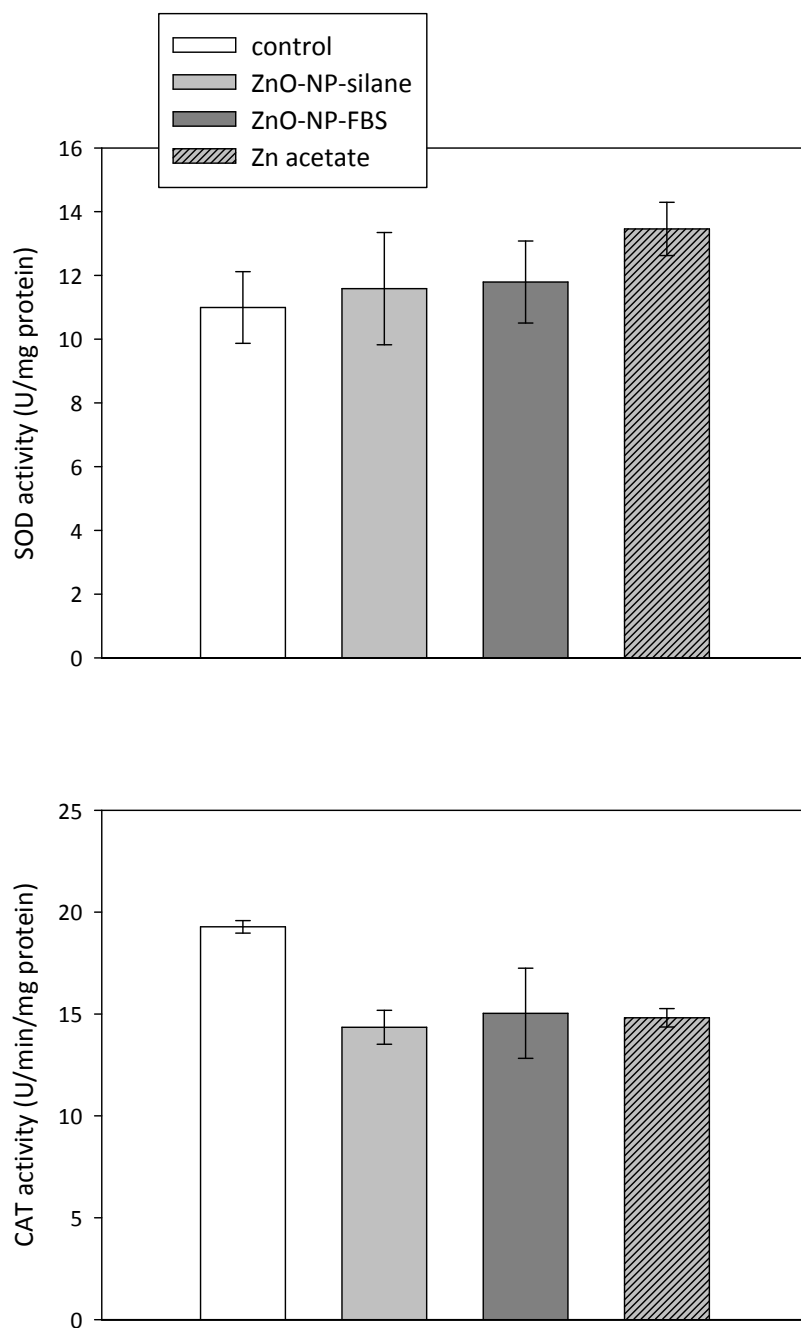

**Figure S3. Quantification of acidic vesicular organelles** with acridine orange staining. Results are presented as changes in mean of green fluorescence expressed as a percentage of the mean fluorescence in control cells (three independent experiments). Fluorescence measurements were carried out on a MoFlo cell sorter. \*\*\*:  $p < 0.001$

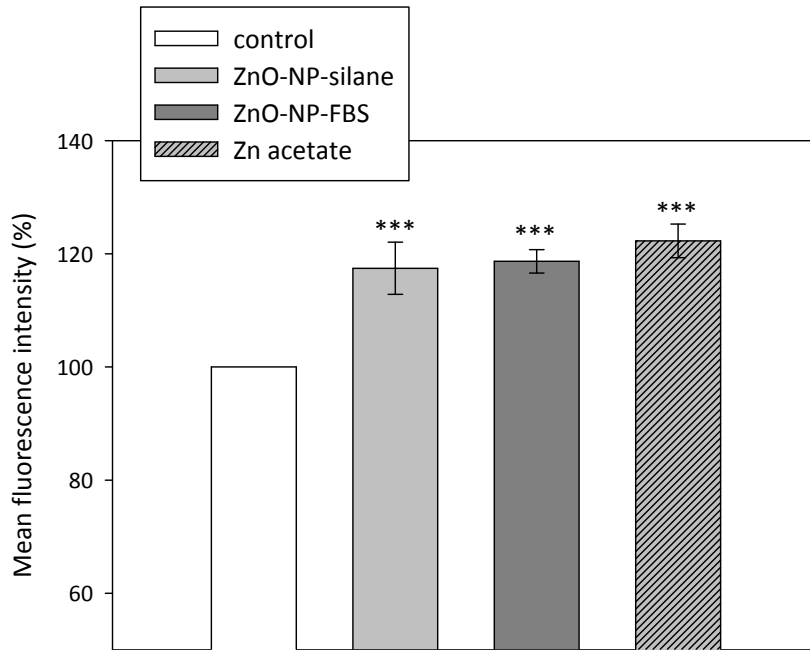

**Figure S4. Quantitative PCR analysis of DRP1, MFN1 and MFN2 mRNA expression** in HepG2 cells after a 6 hour incubation with Zn acetate, ZnO-NP-FBS or ZnO-NP-silane at 90  $\mu$ M. Results are presented as relative expression changes after normalizing with HPRT and 36B4 mRNA. Each value represents the mean of relative expression +SEM of three independent experiments.  $P > 0.05$

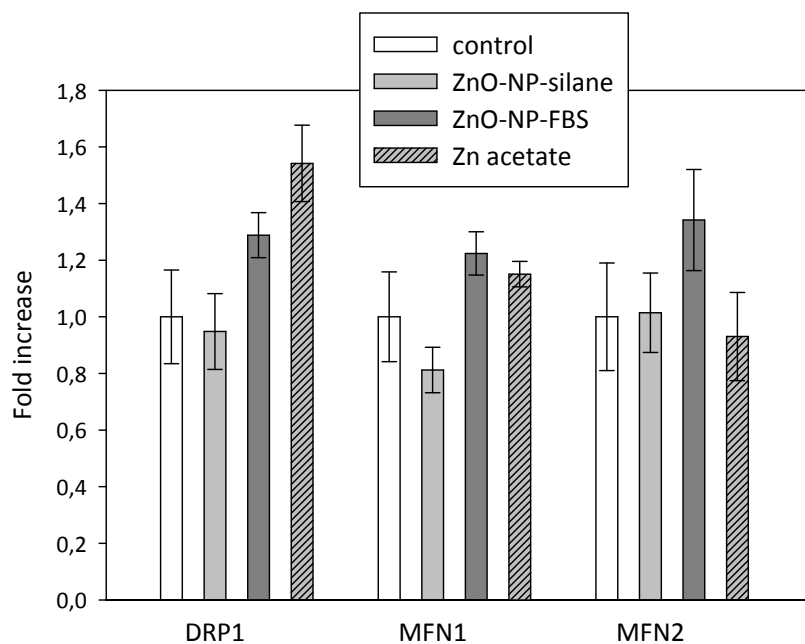

Table S1. Quantitative real time polymerase chain reaction primer sequences

| <b>gene</b>  | <b>Forward</b>                  | <b>Reverse</b>                  |
|--------------|---------------------------------|---------------------------------|
| <b>Met1X</b> | GCT TCT CCT TGC CTC GAA A       | TGA CGT CCC TTT GCA GAT G       |
| <b>HMOX1</b> | ATG ACA CCA AGG ACC AGA GC      | GTG TAA GGA CCCA TCG GAG A      |
| <b>HSPA6</b> | AGG AGG TGG AGA GGA TGG TT      | TGT CCT CTT CGG GAA TCT TG      |
| <b>SOD1</b>  | TGG CCG ATG TGT CTA TTG AA      | ACC TTT GCC CAA GTC ATC TG      |
| <b>SOD2</b>  | GTG GAG AAC CCA AAG GGG AG      | GAA ACC AAG CCA ACC CCA AC      |
| <b>CAT</b>   | TTG CCA CAG GAA AGT ACC CC      | TGA GGC CAA ACC TTG GTG AG      |
| <b>ZnT1</b>  | CGC AGC CAT GGG GTG TTG GG      | CAT CGC CAG CGA CGA GGT CA      |
| <b>ZnT2</b>  | AAC TTT GGC TGG CAG AGA GC      | TGG TGA AGG GTC AAC CCC AT      |
| <b>ZnT7</b>  | GTG CCT GAA CCT CTC TTT CG      | CGG AAA TCA GCC TAA GCA G       |
| <b>Zip1</b>  | GCC AGG AGC TAA CCA TGA AG      | ATG GCC AGG ATG AAC TCT TG      |
| <b>Hamp</b>  | ACC AGT GGC TCT GTT TTC CC      | CAG ATG GGG AAG TGG GTG TC      |
| <b>GCLM</b>  | CCT CCT GCT GTG TGA TGC CAC C   | CGT GCG CTT GAA TGT CAG GAA TGC |
| <b>EGR1</b>  | TAC GAG CAC CTG ACC GCA GAG TC  | CAT GAA GCT CCT CGC TGT GCG TG  |
| <b>MTF1</b>  | CGA AGG AGA AGC CAT TTG AG      | ATT TGC TGC AGC CTT CAG AT      |
| <b>DRP1</b>  | TCA CCC GGA GAC CTC TCA TT      | TCT GCT TCC ACC CCA TTT TCT     |
| <b>MFN1</b>  | TGT TTTGGT CGG AAA CTC TG       | CTGTCTGCGTACGTCTTC CA           |
| <b>MFN2</b>  | TAT CCA CTT CCC TCC TCC CG      | CCACCAGTCCTGACT TCA CC          |
| <b>HPRT</b>  | ATG GAC AGG ACT GAA CGT CTT GCT | TTG AGC ACA CAG AGG GCT ACA ATG |
| <b>36B4</b>  | GAA ATC CTG GGT GTC CGC AAT GTT | AGA CAA GGC CAG GAC TCG TTT GTA |
